# Supplementary material for: The Coxiella burnetii effector EmcB is a deubiquitinase that inhibits RIG-I signaling
Source: PubMed Central journal article supplement — Proc Natl Acad Sci U S A. 2023 Mar 9;120(11):e2217602120. doi: 10.1073/pnas.2217602120 (PMC10089202; doi:10.1073/pnas.2217602120), 2023-03-09
Supplement: pnas.2217602120.sapp.pdf [file pnas.2217602120.sapp.pdf]

# Supplementary Figure 1

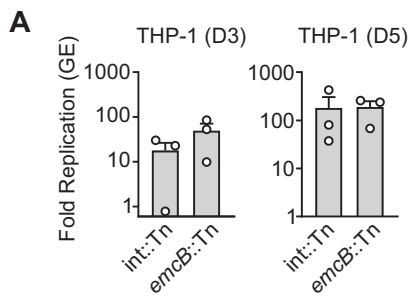

# Supplementary Figure 2

**A**

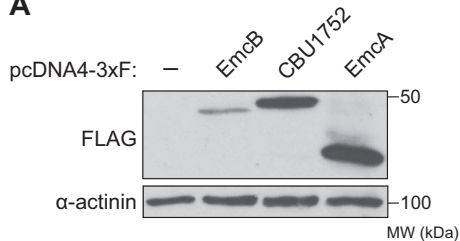

**B**

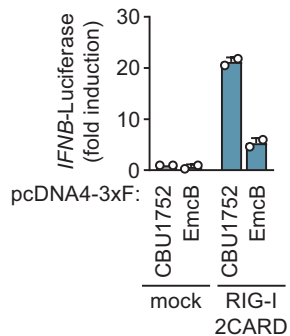

**C**

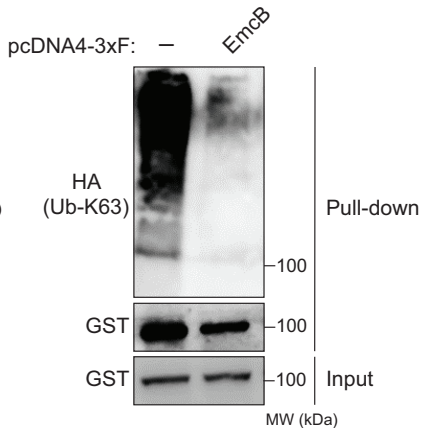

**D**

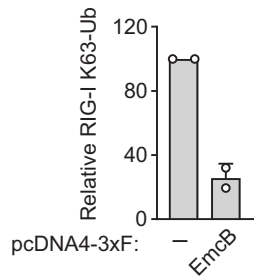

# Supplementary Figure 3

**A**

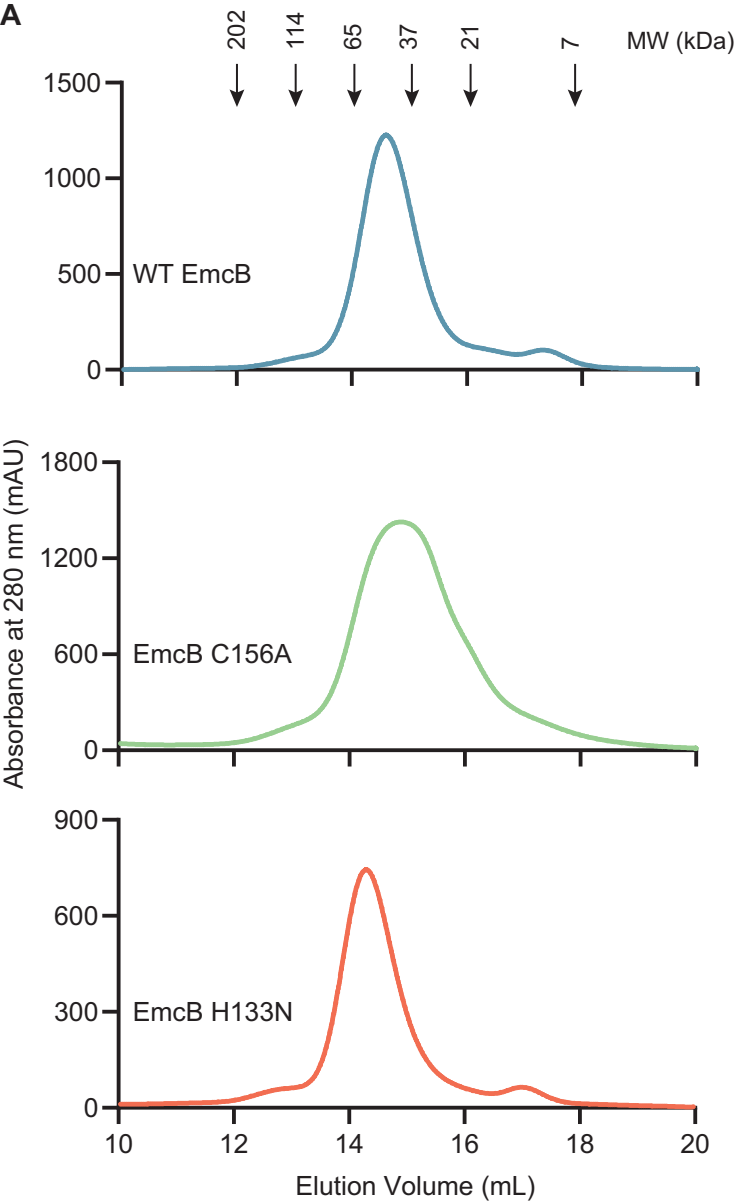

## SI Figure Legends:

### Supplementary Figure 1. EmcB is not required for growth in THP-1 macrophages

(A) qPCR analysis of change in *C. burnetii* genome equivalents (GE) during intracellular growth in PMA-differentiated THP-1 cells infected at an MOI of 30. Data are mean  $\pm$  SD of three independent experiments. P value at D3 and D5 n.s. by unpaired, two-tailed *t*-test.

### Supplementary Figure 2. Production and function of FLAG-tagged EmcA and EmcB

(A) Western blot analysis of FLAG-tagged Dot/Icm effectors in HEK293T cells. Effectors were transfected for 24h and lysates subjected to western blot. Blot is representative of two independent experiments.

(B) IFN- $\beta$  induction as assessed by human *IFNB* promoter-driven luciferase reporter. HEK293T cells transfected with pGL3-*IFNB* overnight were transfected with indicated effector (100 ng) for 24h, and subsequently transfected with pEBG-RIG-I 2CARD (100 ng) for 24h. Dots are independent replicates. Data are mean  $\pm$  SD of two independent experiments. P value for EmcB + 2CARD vs. CBU1752 + 2CARD <0.0001, EmcB no tx. vs. CBU1752 no tx n.s., CBU1752 + 2CARD vs. CBU1752 no tx <0.0001, EmcB + 2CARD vs. EmcB no tx <0.05, by two-way ANOVA with Tukey *post hoc* test.

(C) Western blot analysis of full-length RIG-I pulled-down under stimulatory conditions. HEK293T cells transfected with FLAG-EmcB or empty vector, HA-Ub-K63, GST-RIG-I FI and poly(I:C) (1 ng/ $\mu$ L) were lysed, GST-RIG-I purified and subjected to western blotting with GST and HA antibodies. Blot is representative of two independent experiments.

(D) Quantified densitometry of HA-Ub-K63 to GST-RIG-I in pull-down from (B). Dots are independent replicates. Data are mean  $\pm$  SD of two independent experiments. P value <0.01 by unpaired, two-tailed student's *t*-test.

### Supplementary Figure 3.

(A) Size-exclusion chromatography of WT EmcB (blue), EmcB C156A (green), and EmcB H133N (orange) in 20 mM HEPES-KOH pH 7.50, 250 mM KCl, 1 mM DTT after removal of N-terminal 6xHis-SUMO2 by overnight incubation with SENP2 protease. Fractions that eluted from 14 to 15 mL contained the majority of EmcB as assessed by SDS-PAGE analysis and were used for biochemical assays.

## **SI materials and methods:**

### **Bacterial strains**

*C. burnetii* Nine Mile phase II (NMII), strain RSA493 clone 4 and isogenic derivatives were grown in Acidified Citrate Cysteine Medium-2 (Sunrise Science Products) at 5% CO<sub>2</sub>, 2.5% O<sub>2</sub> at 37°C (1, 2). The *icmL::Tn* mutant and transposon insertion mutant effector sub-library were described previously (3, 4) and grown in the presence of kanamycin (375 µg/mL) or chloramphenicol (3 µg/mL), respectively.

Complemented strains were constructed as previously described (1, 5). In brief, the indicated gene was cloned into the pJB-Kan or pMiniTn7T plasmid under control of the native promoter (*cbu1752*, *cbu1387*) or under control of the *cbu1169* promoter (*cbu2013*), a weak constitutive promoter, and transformed into *C. burnetii* mutants and selected with kanamycin (375 µg/mL).

### **Cell Culture**

HEK293 ISRE-Luciferase, HEK293T, HEK293T DDX58<sup>+/+</sup> and DDX58<sup>-/-</sup> cells (6) were maintained in Dulbecco's modified Eagle's medium (DMEM) high glucose (Gibco™) supplemented with 10% heat inactivated fetal bovine serum (% v/v). THP-1 and J774A.1 cells were maintained in Roswell Park Memorial Institute (RPMI) 1640 (ATCC Modification, Gibco™) supplemented with 10% heat inactivated fetal bovine serum (% v/v). All cells were maintained in humidified air at 5% CO<sub>2</sub>.

### **IFN-treated THP-1 GE analysis**

THP-1 cells were seeded at a density of 5×10<sup>4</sup> cells per well in 24 well plate in RPMI 1640 (ATCC modification) with 10% FBS supplemented with 162 nM PMA overnight. The next day, the media was exchanged for media without PMA supplemented with 100 ng/mL IFN-β (R&D Systems) for 24 hours. The next day, stationary phase *C. burnetii* cultures were quantified by qPCR as above. Bacteria were pelleted, resuspended in DMEM high glucose, and sonicated for 12 minutes (VWR Aquasonic 50T) prior to addition to cells. The media was aspirated, and bacteria were added to cells at an MOI of 20 in RPMI 1640 (ATCC modification) with 10% FBS. Four hours after infection, cells were washed with 1×PBS, and the media replaced with RPMI 1640 ATCC modification with 10% FBS. To enumerate intracellular *C. burnetii*, at indicated time points the media was aspirated, eukaryotic cells were washed once with 1×PBS and then lysed by resuspension in sterile, nuclease-free water. Cell lysates were centrifuged to collect the bacteria. The supernatant was aspirated, and the pellets were frozen until ready for further processing.

Genomic DNA was extracted using the Illustra Bacteria GenomicPrep Mini Prep Kit (Cytiva) according to the manufacturer's instructions. Genomic equivalents (GEs) were quantified by qPCR as described above and the fold replication was expressed as the number of GEs at indicated time point divided by the number of GEs at 4 hours post-infection (Day 0).

### **Cell-based ISRE and IFN- $\beta$ -luciferase reporter assays**

For assays involving the use of the HEK293 cells stably expressing an ISRE-firefly luciferase reporter, cells were seeded at  $2 \times 10^4$  cells per well of a 96 well plate in 100  $\mu$ L DMEM high glucose with 10% FBS one day prior to infection. *C. burnetii* were grown to stationary phase in ACCM-2 and quantified by qPCR as described above. The bacteria were resuspended in DMEM with 10% FBS and added to cells at an MOI of 200. Twenty-four hours after infection, the cells were transfected using 1 ng/ $\mu$ L of poly(I:C) and Xtremegene 9 (Sigma-Aldrich) transfection reagent in DMEM per manufacturer's instructions. Twenty-four hours after transfection, the media was aspirated and 50  $\mu$ L of 1 $\times$  passive lysis buffer (Promega) was added. After incubation at RT for 15 minutes, 20  $\mu$ L of lysate was removed from each well and transferred to a 96 well opaque white tissue culture plate (Falcon) and mixed 1:1 with luciferase substrate.

Luminescence was measured using a Tecan Infinite M1000 plate reader (Tecan, Mannedorf, Switzerland). For assays involving ectopic expression of effector proteins or influenza A NS1 (7), constructs were introduced to cells by transfection with TransIT-LT1 (Mirus) according to the manufacturers' guidelines at a ratio of 3:1 with indicated RIG-I agonist (polyI:C or pEBG-RIG-I 2CARD) and incubated for 48-60h prior to lysis and measurement of luciferase signal as previously described (8). For assays studying MDA5 signaling, HEK293T cells were transfected with pUNO1-MDA5 and an ISRE-luciferase reporter plasmid (Promega). To study the cGAS-STING pathway, HEK293T cells were reconstituted with plasmids encoding cGAS, STING and an ISRE-luciferase reporter (Promega). At 24hr after transfection, cells were lysed and analyzed as above.

For assays involving the human *IFNB* promoter luciferase plasmid, HEK293T cells were seeded in 96 well plates at a density of  $2 \times 10^4$  and reverse transfected with 20 ng of pGL3-*IFNB* (9) with TransIT-LT1 (Mirus) according to manufacturer's guidelines. The next day, cells were transfected with 100 ng of pcDNA4-3xFLAG encoding either CBU1752 or EmcB. 24h later, cells were transfected with 100 ng of pEBG-RIG-I 2CARD or pEBG control. After 24h, cells were lysed and analyzed as above.

### ***C. burnetii* GE analysis in THP-1 macrophages**

THP-1 cells were seeded at a density of  $4 \times 10^4$  cells per well in 96 well plate in RPMI 1640 (ATCC modification) with 10% FBS (media) supplemented with 162 nM PMA overnight. The next day, the media was exchanged for media without PMA for 24 hours. The day of the infection, *C. burnetii* cultures were pelleted and resuspended in media, enumerated by qPCR as above, and added to cells at an MOI of 30. Four hours after infection, the supernatant was aspirated, cells were washed twice and resuspended in fresh media. At Day 0 (4h post-infection), Day 3 and Day 5 of infection, the media was collected, the mammalian cells triturated in 200  $\mu$ L of ultra-pure water (AmericanBio) and centrifuged at 17,000g for 15 minutes at 4°C. The supernatant was aspirated, the pellets were frozen and stored at -20°C until ready for further processing. Genomic DNA was extracted using the Illustra Bacteria GenomicPrep Mini Prep Kit (Cytiva) according to the manufacturer's instructions. Genomic equivalents (GEs) were quantified by qPCR as described above and the fold replication was expressed as the number of GEs at indicated time point divided by the number of GEs at 4-hours post-infection (Day 0).

### **Cytokine Expression Analysis in Macrophages and HEK293T cells**

J774A.1 cells were seeded a density of  $2 \times 10^6$  in a 10 cm<sup>2</sup> dish in RPMI 1640 (ATCC modification) with 10% FBS and infected at an MOI of 500. After 4 days of infection, total RNA was extracted with the RNeasy mini kit (Qiagen) per manufacturer protocol. Fresh  $\beta$ -mercaptoethanol (1% v/v) was added to buffer RLT1 at the time of sample preparation, and on-column DNase I digest was done to remove gDNA. cDNA was prepared with the iScript Advanced cDNA synthesis kit (Bio-Rad) and the abundance of cDNA for genes of interest was determined with quantitative PCR using iQ SYBR Green Supermix (Bio-Rad) on a Bio-Rad CFX thermocycler.

For analysis of *IFNB* expression in HEK293T, cells were seeded at a density of  $3 \times 10^5$  in 6 well plates in DMEM high glucose with 10% FBS and infected at an MOI of 1000. After 24h, cells were transfected with 1 ng/ $\mu$ L poly(I:C) using TransIT-LT1 (Mirus) according to manufacturer's instructions and incubated an additional 16h. Total RNA and qPCR analysis was done as above.

### **Protein Purification**

Codon-optimized EmcB (Genscript) was cloned into a custom pET vector encoding an N-terminal 6xHis-SUMO2-tagged fusion protein (10) and expressed in BL21 DE3 RIL *E. coli* (Agilent) containing the rare

tRNA plasmid pRARE2. *E. coli* was grown in 25 mL starter cultures of LB broth (miller) supplemented with 0.2% glucose, 100 µg/mL ampicillin and 12.5 µg/mL chloramphenicol. Cultures were back diluted 1:100 into LB broth (miller) with 100 µg/mL ampicillin and 12.5 µg/mL chloramphenicol and grown to an OD600 of 0.5-1.0 at 37°C with 200 rpm. Upon reaching desired optical density, cultures were rapidly cooled in an ice water bath with vigorous intermittent shaking and then induced with 0.5 mM IPTG (GoldBio). Induced cultures were returned to the incubator overnight at 16°C with 200 rpm. Bacteria were pelleted at 5000g, washed once with 1×PBS, flash frozen in liquid nitrogen, and stored at -80°C until ready for protein purification. Pellets were resuspended in a lysis buffer comprised of 20 mM HEPES-KOH pH 7.5, 250 mM NaCl, 20 mM imidazole, 10% glycerol and 1 mM DTT and lysed by sonication (10s, 20s off, 70% power, total time: 5 minutes). Lysates were clarified by centrifugation at 50000g for 20 minutes. Recombinant protein was purified by gravity chromatography and binding to Ni-NTA resin (QIAGEN). Resin was washed with lysis buffer supplemented to 1 M NaCl, washed with lysis buffer, and then eluted with lysis buffer supplemented to 300 mM imidazole. Purified protein was supplemented with recombinant human SENP2 protease (D364–L589, M497A) to remove the SUMO2 tag, and dialyzed overnight against 20 mM HEPES-KOH pH 7.5, 250 mM KCl, 1 mM DTT. Proteins were concentrated using a 10K or 30K-cutoff concentrator (Millipore) and further purified by size-exclusion chromatography on a Superdex 200 10/300 GL column (Cytiva) in 20 mM HEPES-KOH pH 7.5, 250 mM KCl, 1 mM DTT. Fractions containing protein were identified by absorbance at 280 nm, run on an SDS-PAGE, and those containing untagged EmcB were pooled and concentrated to 20–50 mg/mL in 20 mM HEPES-KOH pH 7.40, 250 mM KCl, 1 mM DTT or concentrated to 10 mg/mL and supplemented with 10% glycerol for working stocks. Protein was snap-frozen in liquid nitrogen and stored at -80°C in small aliquots until ready for use.

For experiments in Fig 3A and 4H, MBP-EmcB was used. To purify, MBP-EmcB, EmcB was cloned into pMAL-C5X. MACH1 *E. coli* expressing pMAL-C5X-EmcB construct was grown in LB 0.2% glucose with 100 µg/mL ampicillin, diluted 1:100, grown to an OD600 of 0.5-1.0 at 37°C with 200 rpm of shaking. Cultures at desired OD600 were rapidly chilled in an ice water bath for 15 minutes and induced with 0.5 mM IPTG (GoldBio). Cultures were returned to incubator at 16°C with 225 rpm shaking overnight. Bacteria were pelleted at 5000g for 20 minutes, resuspended in 1×PBS, transferred to a 50 mL conical, pelleted at 3000g for 15 minutes, the supernatant aspirated, the pellets snap frozen in liquid nitrogen, and



stored at -80°C until ready for purification. Pellets were resuspended in a lysis buffer composed of 20 mM HEPES-KOH pH 7.5, 250 mM NaCl, 10% glycerol and 2 mM DTT and lysed by sonication (10s, 20s off, 70% power, 5 minutes total). Lysates were clarified by centrifugation at 50000g for 20 minutes.

Recombinant protein was purified by gravity chromatography and binding to Maltose resin (NEB). Resin was washed with lysis buffer supplemented to 1 M NaCl and then eluted with Lysis Buffer supplemented with 10 mM maltose. Protein was dialyzed overnight in 20 mM HEPES-KOH pH 7.40, 250 mM KCl, 1 mM DTT, 10% glycerol. Dialyzed protein was concentrated to 10 mg/mL, snap frozen in liquid nitrogen, and stored at -80°C in small aliquots until ready for use.

### **RIG-I ubiquitination assays**

Purification of GST-RIG-I 2CARD from mammalian cells was done as previously described (8, 11). pEBG-RIG-I 2CARD (4 µg) and pcDNA4 carrying indicated gene or pCAGGS-NS1 (Influenza A virus, 10 µg) (7) and pGL4.45[luc2P/ISRE/Hygro] (Promega) (100 ng) were transfected with Mirus TransIT-LT1 into 5x10<sup>6</sup> HEK293T cells in a 10 cm<sup>2</sup> dish in DMEM high glucose with 5% FBS per manufacturer guidelines. After 48h, the media was aspirated, cells were tritured from the dish in 2 mL of ice-cold 1xPBS with 2 mM EDTA and pelleted at 200g for 2 minute. The supernatant was aspirated, and the pellet was resuspended in 1 mL of ice-cold NP-40 lysis buffer (50 mM HEPES-KOH pH 7.40, 150 mM NaCl, 1 mM DTT, 1 mM EDTA, 50 mM NEM, 1 mM PMSF, 1% IGEPAL CA-630 (v/v) + Roche complete protease inhibitor tablet). Cells were incubated on ice for 15 minutes with occasional flicking and clarified by centrifugation for 10 minutes at 13000g at 4°C. ISRE luciferase signal in clarified lysates was measured as above. For pull-downs, clarified lysates were transferred to 30 µL of glutathione beads (Pierce™) equilibrated in lysis buffer and incubated for two hours at 4°C with constant rotation. Beads were washed five times with 20 volumes of lysis buffer for one minute each and then resuspend in one volume of 2xLaemmli sample buffer (65 mM Tris-HCl pH 6.80, 2% SDS, 10% glycerol, 0.004% Bromophenol blue, 5% 2-mercaptoethanol), snap frozen and stored at -20°C until ready for use. Samples were thawed on the bench top and loaded onto to 4–20% Mini-PROTEAN TGX gels (BioRad). Resolved gels were transferred onto PVDF membranes and probed with a ubiquitin antibody (clone P4D1, Cell Signaling 1:1,000) and GST antibody (polyclonal, Cytiva 1:5,000). Blots were probed with cognate secondary antibodies conjugated to HRP and chemiluminescence was measured with an ImageQuant 800 biomolecular

imager. Ubiquitin conjugates were identified as specific bands of a higher than predicted molecular weight which reacted with both ubiquitin and GST antibodies. Densitometric analysis of ubiquitinated RIG-I was performed with ImageJ analysis (12). Briefly, images were inverted, and ubiquitin band intensity was measured for each condition and compared to that of the GST-RIG-I 2CARD control condition.

For *in vitro* RIG-I deubiquitination assays, GST-RIG-I 2CARD was purified from cells as above with the following modifications. After five washes with 20 volumes of lysis buffer, beads were washed five times with 20 volumes of wash buffer (50 mM HEPES-KOH pH 7.40, 150 mM NaCl, 5 mM DTT). EmcB was preincubated in wash buffer and added to 15  $\mu$ L of bead slurry in wash buffer to a final concentration of 40  $\mu$ M (estimated  $\sim$ 200  $\mu$ M GST-RIG-I 2CARD). Reactions were incubated for one hour at 37°C and then quenched with 10  $\mu$ L of 4 $\times$ Laemmli sample buffer (130 mM Tris-HCl pH 6.80, 4% SDS, 20% glycerol, 0.008% Bromophenol blue), and processed as above. Where indicated, EmcB was preincubated in wash buffer supplemented with 50 mM NEM or 20 mM EDTA for 15 minutes prior to co-incubation with GST-RIG-I 2CARD.

For measuring the ubiquitination of full length RIG-I,  $5 \times 10^6$  HEK293T cells were seeded in a 10 cm<sup>2</sup> dish in DMEM high glucose with 5% FBS and reverse transfected with pcDNA4-3xFLAG-EmcB or empty vector, pEBG-RIG-I Full-length and pRK5-HA-Ubiquitin K63 only (K6R, K11R, K27R, K29R, K33R, K48R) (13) with Trans-IT LT1 transfection reagent (Mirus) per manufacturer's guidelines. After 48h, cells were lysed, and GST-RIG-I (FL) was isolated and analyzed as was done for GST-RIG-I 2CARD. Ubiquitin conjugates associated with RIG-I were expressed as the HA to GST signal in the immunoprecipitated samples. HA antibody (Millipore-Sigma, Clone 3F10) was used for HA western blots at a dilution of 1:3333 in 5% milk in TBS.

#### **Di-ubiquitin cleavage assay with MBP EmcB**

DUB activity assays were performed similar to as previously described (14, 15). In brief, purified MBP or MBP-EmcB (1  $\mu$ M) was incubated with 0.5  $\mu$ M di-ubiquitin in 10  $\mu$ L reactions of 50 mM Tris-HCl pH 7.50, 120 mM KCl, 5 mM MgCl<sub>2</sub>, 1 mM DTT for two hours before being quenched with SDS-PAGE sample buffer and resolved on a 4–20% Mini-PROTEAN TGX gel (Bio-Rad) and stained with Sypro Ruby (Sigma-Aldrich) per the manufacturer's guidelines. Stained gels were imaged on an Amersham ImageQuant 800 biomolecular imager in the UV channel.

### **Cy5-Ubiquitin-VME gel shift assay**

Ubiquitin-VME gel shifts were performed as previously described (16). Purified EmcB or indicated point mutant was diluted to 0.6  $\mu\text{M}$  in 10  $\mu\text{L}$  reactions of 25 mM Tris-HCl pH 7.40, 150 mM KCl, 2 mM DTT with or without of 2.5  $\mu\text{M}$  Cy5-Ubiquitin-VME (UBPBio) for 1.5 hours wrapped in foil at room temperature. Reactions were quenched with addition of 4  $\mu\text{L}$  of 4 $\times$  Laemmli sample buffer without reducing agent and resolved on a 4–20% Mini-PROTEAN TGX gel (Bio-Rad). Resolved gels were immediately imaged on an Amersham ImageQuant 800 biomolecular imager in the Cy5 channel, and then fixed and silver stained (Pierce™ Silver Stain Kit). Silver-stained gels were imaged with the Amersham ImageQuant 800 biomolecular imager using the optical density measurement feature.

### **Ubiquitin-propargylamine gel shift assay**

Ubiquitin-PA gel shifts were performed as previously described (17, 18). EmcB or EmcB C156A was diluted to 0.6  $\mu\text{M}$  in 10  $\mu\text{L}$  reactions of 25 mM Tris-HCl pH 7.40, 150 mM KCl, 10 mM DTT with or without addition of 2.5  $\mu\text{M}$  N-terminally HA-tagged ubiquitin-propargylamine (HA-Ub-PA) (South Bay Bio) for 1 hour. Reactions were quenched with 4  $\mu\text{L}$  of 4 $\times$  Laemmli sample buffer without reducing agent and resolved on a 10% SDS-PAGE. Gels were stained with Sypro Ruby (Sigma-Aldrich) or silver stained (Pierce™ Silver Stain Kit) per manufacturers guidelines and imaged on an Amersham ImageQuant 800 biomolecular imager.

### **Ubi-AMC assay**

Ubiquitin-like modifier AMC-cleavage experiments were done as previously described (15, 19). Indicated conjugate, Ub-AMC, NEDD8-AMC, ISG15-AMC (South Bay Bio), was diluted to 666 nM to a total volume of 60  $\mu\text{L}$  AMC-cleavage buffer (50 mM Tris-HCl, pH 7.50, 0.5 mM EDTA, 5 mM DTT, 0.1 % (w/v) bovine serum albumin) in a 96-well black polystyrene plate (Costar). AMC conjugates were equilibrated by shaking at 30°C for 5 min in a fluorescent plate reader (Tecan). EmcB was equilibrated at room temperature for 10 minutes in AMC buffer, and then 40  $\mu\text{L}$  was added to the AMC conjugates to a final concentration of 3.5 nM (total volume 100  $\mu\text{L}$ ), mixed for 10s by shaking, and then fluorescence was measured every 30 seconds for 60 min by 340 nm/441 nm (20 nm bandwidth) excitation/emission.

Enzyme kinetics were determined using Graphpad Prism analysis of the linear velocity of DUB activity as previously described (20). Enzyme kinetic assays were done in AMC buffer with EmcB at a concentration of 150 nM which was determined from linear range of enzyme kinetic assays with 1  $\mu$ M of Ub-AMC.

#### **Ubiquitin-propargylamine inhibition of DUB activity assay**

MBP-EmcB was diluted to 8.2 nM in 39  $\mu$ L AMC buffer. HA-Ub-PA was prepared at 40x desired concentration in AMC buffer and 1  $\mu$ L at indicated concentration was added to MBP-EmcB. Mixtures were incubated for 15 minutes at room temperature before adding 10  $\mu$ L MBP-EmcB and HA-UB-PA mixture to 30  $\mu$ L of Ub-AMC in AMC buffer at a concentration of 333.3 nM (Total volume, 40  $\mu$ L, final concentrations: 250 nM Ub-AMC, 2 nM EmcB). The samples were mixed by 15 s of shaking and Ub-AMC cleavage was measured as above on a Tecan plate reader every 30s for 60 minutes.

#### **Ubiquitin cleavage assay by varied chain length**

To measure kinetic cleavage of ubiquitin chains, EmcB was diluted to 15  $\mu$ M in DUB buffer (50 mM Tris-HCl, pH 7.5, 150 mM KCl, 5 mM DTT) and then 1  $\mu$ L was added to 30  $\mu$ L of 1  $\mu$ M K63-linked hexa-ubiquitin or diubiquitin (Boston Biochem) in DUB buffer. At indicated time, 4  $\mu$ L of reaction was sampled, quenched with 2  $\mu$ L 4 $\times$ Laemmli sample buffer (130 mM Tris-HCl pH 6.80, 4% SDS, 20% glycerol, 0.008% Bromophenol blue), and stored on ice until all samples were collected. Samples were resolved on a 4–20% Mini-PROTEAN TGX gel (BioRad) and stained with SYPRO Ruby per manufacturer's instructions. Stained gels were imaged in the UV channel with an ImageQuant 800.

#### **Thermal Denaturation Assay**

Thermal denaturation assays to assess protein folding were done as previously described (10, 21). Indicated protein was diluted to a final concentration of 5  $\mu$ M in 20  $\mu$ L of 20 mM HEPES-KOH pH 7.40, 150 mM KCl and 3 $\times$  SYPRO Orange dye in technical duplicate. Using a Bio-Rad CFX thermocycler, samples were brought from 25°C to 95°C at a rate of 1°C per minute while measuring SYBR fluorescence. The derivative of SYBR fluorescence over time was calculated using Bio-Rad CFX Manager (dRFU/dT), then expressed as a percent of the maximum change in fluorescence for each sample. The melting temperature was determined automatically by the Bio-Rad CFX Manager as the inflection of dRFU/dT.

#### **Phylogenetic tree ubiquitin-like modifiers**

Ubiquitin-like modifiers were identified from published work (22). Sequences were extracted from Uniprot for indicated human ubiquitin-like modifier for the specified ubiquitin-like domain. In the case of ISG15, which contains tandem ubiquitin like domains, the C-terminal ubiquitin-like domain was selected for alignment. Sequences were aligned with Clustal Omega (23), exported to Jalview (24) and formatted into a tree by average distance by PID. Trees were visualized with Interactive tree of life (iTOL) v5 (25). Tree was rooted on ATG12.

### **Measurement of FLAG-tagged effector production**

HEK293T cells were seeded at a density of  $3 \times 10^5$  in 6 well plates in DMEM high glucose with 10% FBS and transfected with pcDNA4/TO-3xFLAG containing indicated effector and incubated for 48h. Cells were harvested in 1xPBS and resuspended in NP-40 Lysis buffer (50 mM HEPES-KOH pH 7.40, 150 mM NaCl, 1 mM EDTA, 1% IGEPAL CA-630 (v/v) + Roche complete protease inhibitor tablet). Samples were incubated on ice for 15 minutes, clarified by centrifugation at 13000g at 4°C for 15 minutes, and the supernatant harvested and 4x Lammeli buffer added to 1x. Samples were boiled for 10 minutes, loaded onto to 4–20% Mini-PROTEAN TGX gels (BioRad). Resolved gels were transferred onto PVDF membranes and probed with M2 FLAG antibody (Sigma, 1:5000) and  $\alpha$ -actinin antibody (BD Biosciences, 1:1000).

### **SI References:**

1. A. Omsland, *et al.*, Isolation from animal tissue and genetic transformation of *Coxiella burnetii* are facilitated by an improved axenic growth medium. *Appl. Environ. Microbiol.* **77** (2011).
2. A. Omsland, *et al.*, Host cell-free growth of the Q fever bacterium *Coxiella burnetii*. *Proc. Natl. Acad. Sci. U. S. A.* **106** (2009).
3. H. J. Newton, *et al.*, A Screen of *Coxiella burnetii* Mutants Reveals Important Roles for Dot/Icm Effectors and Host Autophagy in Vacuole Biogenesis. *PLoS Pathog.* **10** (2014).
4. E. Crabill, W. B. Schofield, H. J. Newton, A. L. Goodman, C. R. Roy, Dot/Icm-translocated proteins important for biogenesis of the coxiella burnetii-containing vacuole identified by screening of an effector mutant sublibrary. *Infect. Immun.* **86** (2018).
5. P. A. Beare, C. L. Larson, S. D. Gilk, R. A. Heinzen, Two systems for targeted gene deletion in *Coxiella burnetii*. *Appl. Environ. Microbiol.* **78** (2012).

6. J. Zhu, *et al.*, Antiviral Activity of Human OASL Protein Is Mediated by Enhancing Signaling of the RIG-I RNA Sensor. *Immunity* **40** (2014).
7. C. F. Basler, *et al.*, Sequence of the 1918 pandemic influenza virus nonstructural gene (NS) segment and characterization of recombinant viruses bearing the 1918 NS genes. *Proc. Natl. Acad. Sci. U. S. A.* **98** (2001).
8. M. U. Gack, *et al.*, Influenza A Virus NS1 Targets the Ubiquitin Ligase TRIM25 to Evade Recognition by the Host Viral RNA Sensor RIG-I. *Cell Host Microbe* **5** (2009).
9. M. Gentili, *et al.*, Transmission of innate immune signaling by packaging of cGAMP in viral particles. *Science* (80-. ). **349** (2015).
10. B. Lowey, *et al.*, CBASS Immunity Uses CARF-Related Effectors to Sense 3'-5'- and 2'-5'-Linked Cyclic Oligonucleotide Signals and Protect Bacteria from Phage Infection. *Cell* **182** (2020).
11. M. U. Gack, *et al.*, TRIM25 RING-finger E3 ubiquitin ligase is essential for RIG-I-mediated antiviral activity. *Nature* **446** (2007).
12. J. Schindelin, *et al.*, Fiji: An open-source platform for biological-image analysis. *Nat. Methods* **9** (2012).
13. L. L. Kah, *et al.*, Parkin mediates nonclassical, proteasomal-independent ubiquitination of synphilin-1: Implications for lewy body formation. *J. Neurosci.* **25** (2005).
14. R. K. Shrestha, *et al.*, Insights into the mechanism of deubiquitination by jamm deubiquitinases from cocrystal structures of the enzyme with the substrate and product. *Biochemistry* **53** (2014).
15. J. M. Berk, *et al.*, A deubiquitylase with an unusually high-affinity ubiquitin-binding domain from the scrub typhus pathogen *Orientia tsutsugamushi*. *Nat. Commun.* **11** (2020).
16. A. Borodovsky, *et al.*, Chemistry-based functional proteomics reveals novel members of the deubiquitinating enzyme family. *Chem. Biol.* **9** (2002).
17. R. Ekkebus, *et al.*, On terminal alkynes that can react with active-site cysteine nucleophiles in proteases. *J. Am. Chem. Soc.* **135** (2013).
18. T. E. T. Mevissen, *et al.*, OTU deubiquitinases reveal mechanisms of linkage specificity and enable ubiquitin chain restriction analysis. *Cell* **154**, 169 (2013).
19. M. E. Morrow, *et al.*, Stabilization of an unusual salt bridge in ubiquitin by the extra C-terminal

domain of the proteasome-associated deubiquitinase UCH37 as a mechanism of its exo specificity. *Biochemistry* **52** (2013).

20. M. T. Morgan, C. Wolberger, "Competition assay for measuring deubiquitinating enzyme substrate affinity" in *Methods in Molecular Biology*, (2018).
21. B. Duncan-Lowey, N. K. McNamara-Bordewick, N. Tal, R. Sorek, P. J. Kranzusch, Effector-mediated membrane disruption controls cell death in CBASS antiphage defense. *Mol. Cell* **81** (2021).
22. U. F. Cajee, R. Hull, M. Ntwasa, Modification by ubiquitin-like proteins: Significance in apoptosis and autophagy pathways. *Int. J. Mol. Sci.* **13** (2012).
23. F. Sievers, *et al.*, Fast, scalable generation of high-quality protein multiple sequence alignments using Clustal Omega. *Mol. Syst. Biol.* **7** (2011).
24. A. M. Waterhouse, J. B. Procter, D. M. A. Martin, M. Clamp, G. J. Barton, Jalview Version 2-A multiple sequence alignment editor and analysis workbench. *Bioinformatics* **25** (2009).
25. I. Letunic, P. Bork, Interactive tree of life (iTOL) v5: An online tool for phylogenetic tree display and annotation. *Nucleic Acids Res.* **49** (2021).
